# Supplementary material for: Synthesis and Anti-Cancer Activity of Novel Selective Glucocorticoid Receptor Agonists of Phenylethanolamine Series
Source: Preprints.org preprint supplement (doi:10.20944/preprints202407.0030.v1), 2024-07-01
Supplement: Supplementary file 5 [file supplementary]

**Supplementary Table 1. Primer sets for Q-PCR analysis**

| Gene symbol   | Sequence                 |                         |
|---------------|--------------------------|-------------------------|
|               | Forward 5'-3'            | Reverse 5'-3'           |
| <i>Rpl27</i>  | ACCGCTACCCCCGCAAAGTG     | CCCGTCGGGCCTTGCGTTTA    |
| <i>FKBP51</i> | GAATGGTGAGGAAACGCCGAT    | TGCCAAGACTAAAGACAAATGGT |
| <i>GILZ</i>   | AACAACGAAATGTATCAGACCC   | TGTCCAGCTTAACGGAAACCA   |
| <i>IL1</i>    | ATGATGGCTTATTACAGTGGCAA  | GTCGGAGATTTCGTAGCTGGA   |
| <i>IL6</i>    | GGGAGCGATAAACACAAACTCTGC | GAGAAGGCAACTGGACCGAAG   |
| <i>CCND1</i>  | AGACCTTTGTGGCCCTCTGTG    | CAGTCCGGGTCACACTTGAT    |
| <i>CCND2</i>  | CTCAGACCTTCATTGCTCTGTGT  | CTCAGTCAGGGCATCACAAGT   |
