# Supplementary material for: Synthesis and Anti-Cancer Activity of Novel Selective Glucocorticoid Receptor Agonists of Phenylethanolamine Series
Source: Preprints.org preprint supplement (doi:10.20944/preprints202407.0030.v1), 2024-07-01
Supplement: Supplementary file 6 [file supplementary]

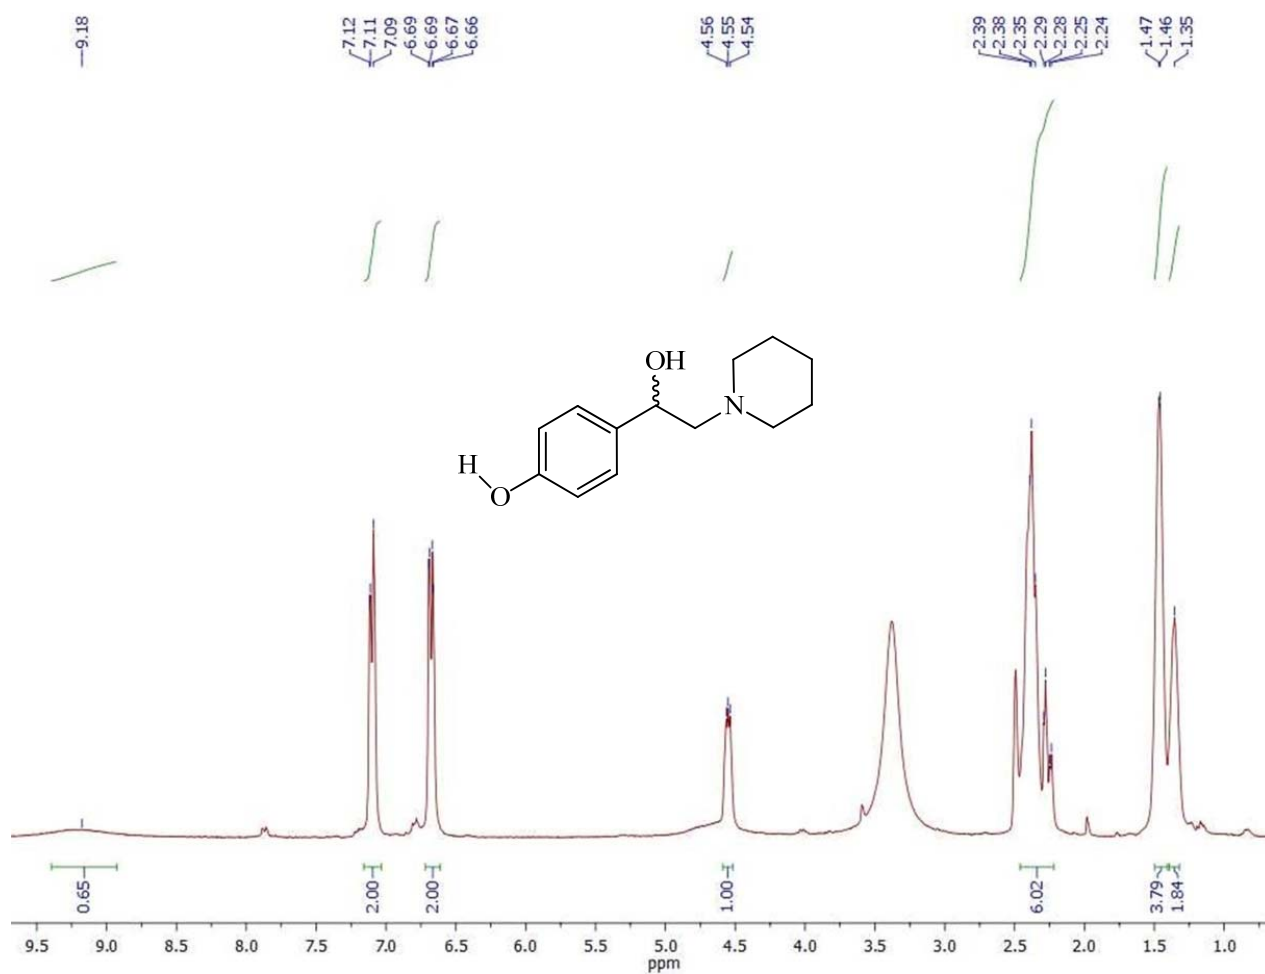

**Supplementary Figure 3. Copy of <sup>1</sup>H NMR spectra of 4-(1-hydroxy-2-(piperidin-1-yl)ethyl)phenol (CpdA-03).** The structures of compounds were established using 1D NMR (<sup>1</sup>H, <sup>13</sup>C) spectroscopy on Bruker 300 spectrometers at 293 (see details in “Materials and Methods”)
